# Supplementary material for: A Bioinformatic Approach for the Identification of Molecular Determinants of Resistance/Sensitivity to Cancer Thermotherapy
Source: Hindawi journal article supplement (doi:10.1155/2019/4606219), 2019-11-11
Supplement: f1 [file 4606219.f1.pdf]

**(A)**

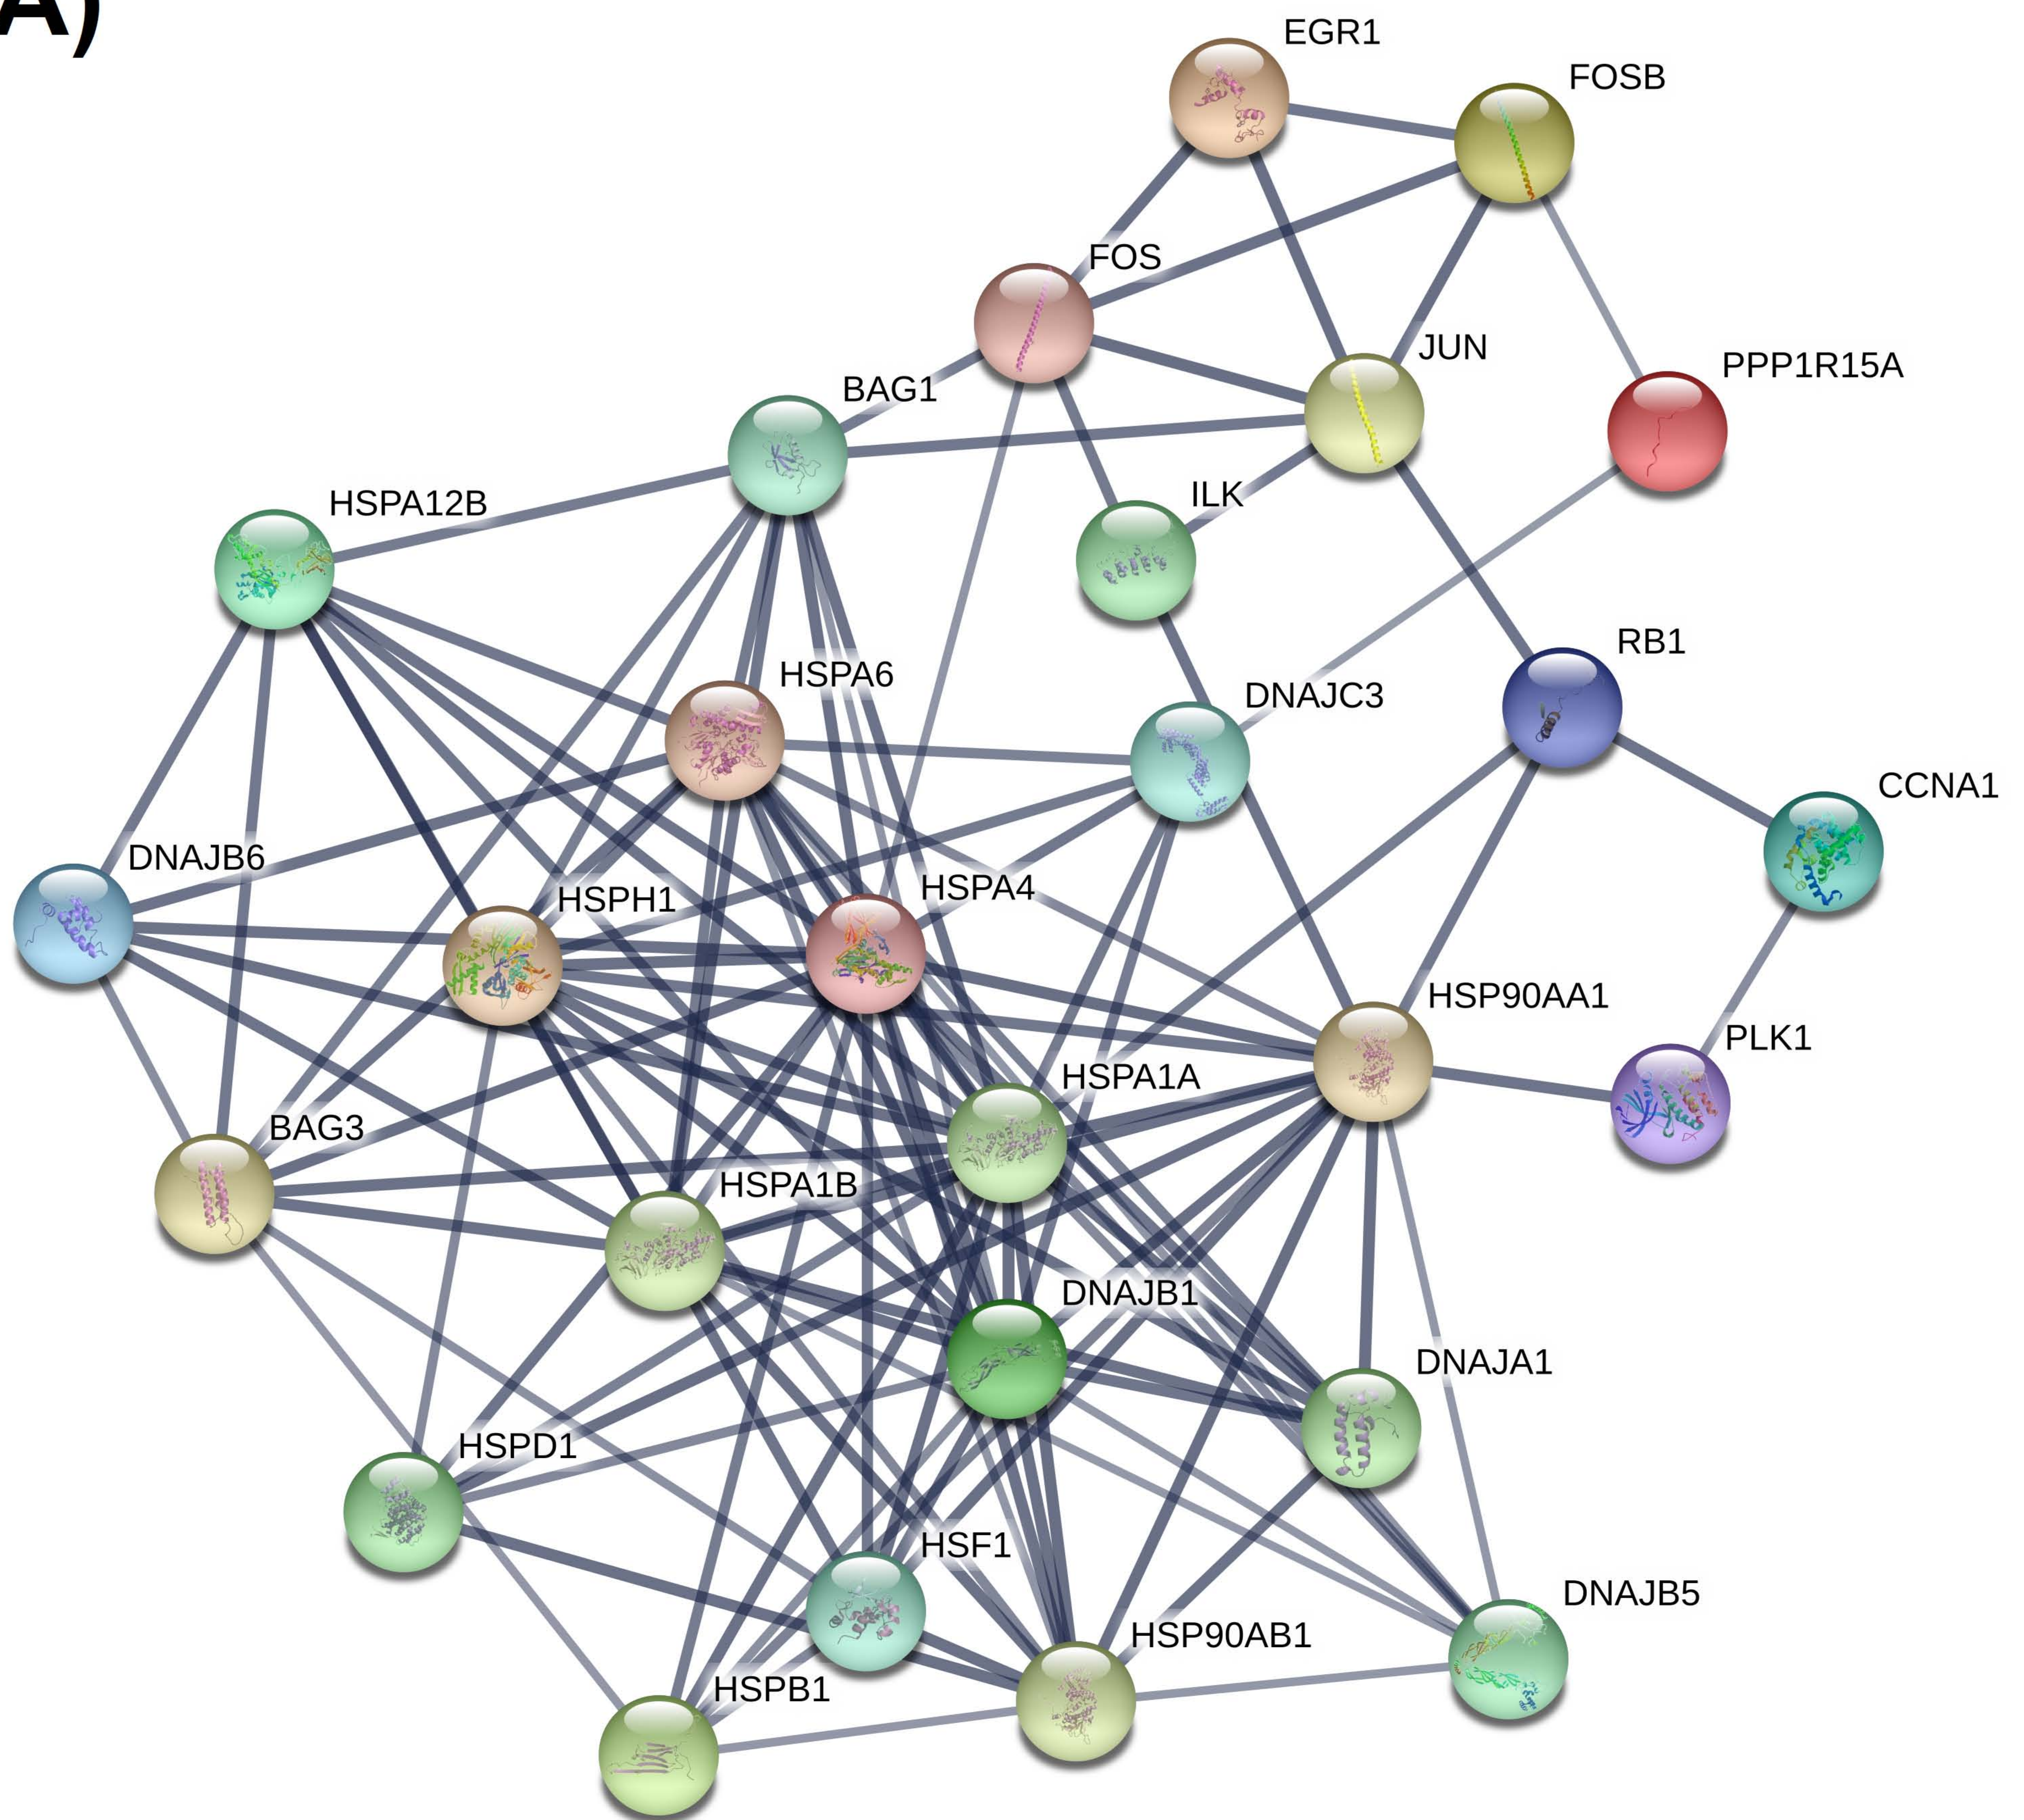

**(B)**

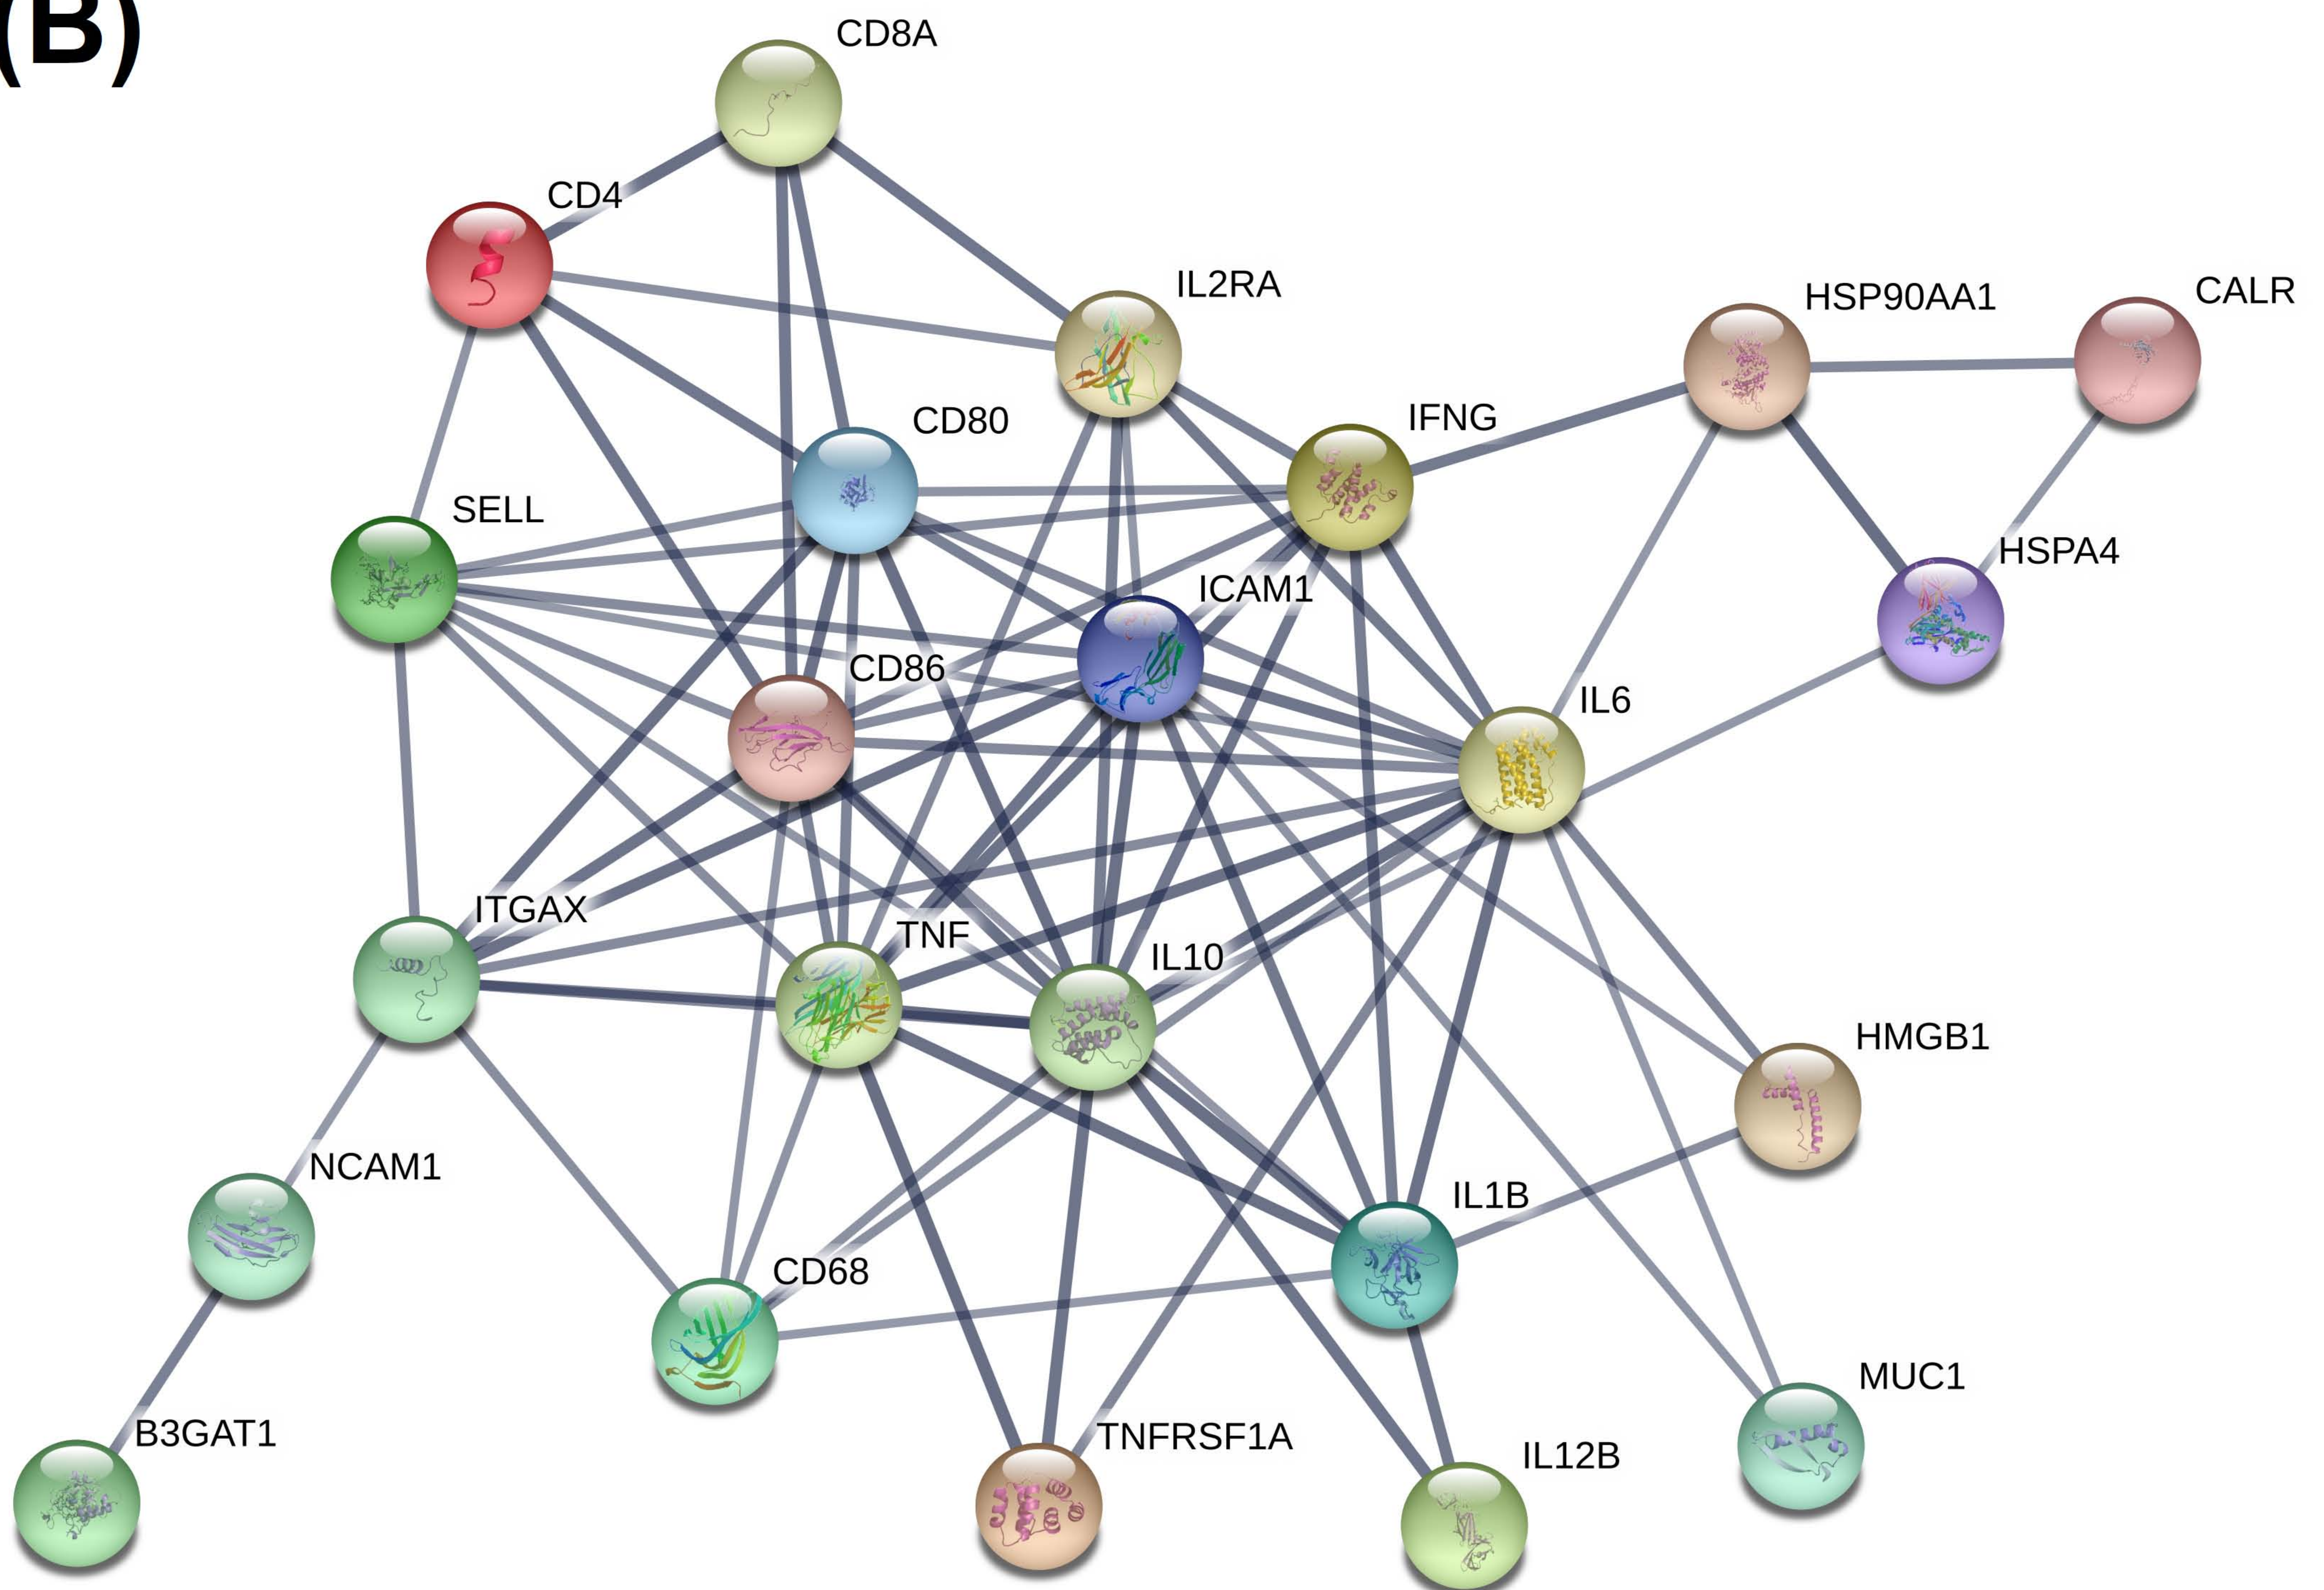



**(A)**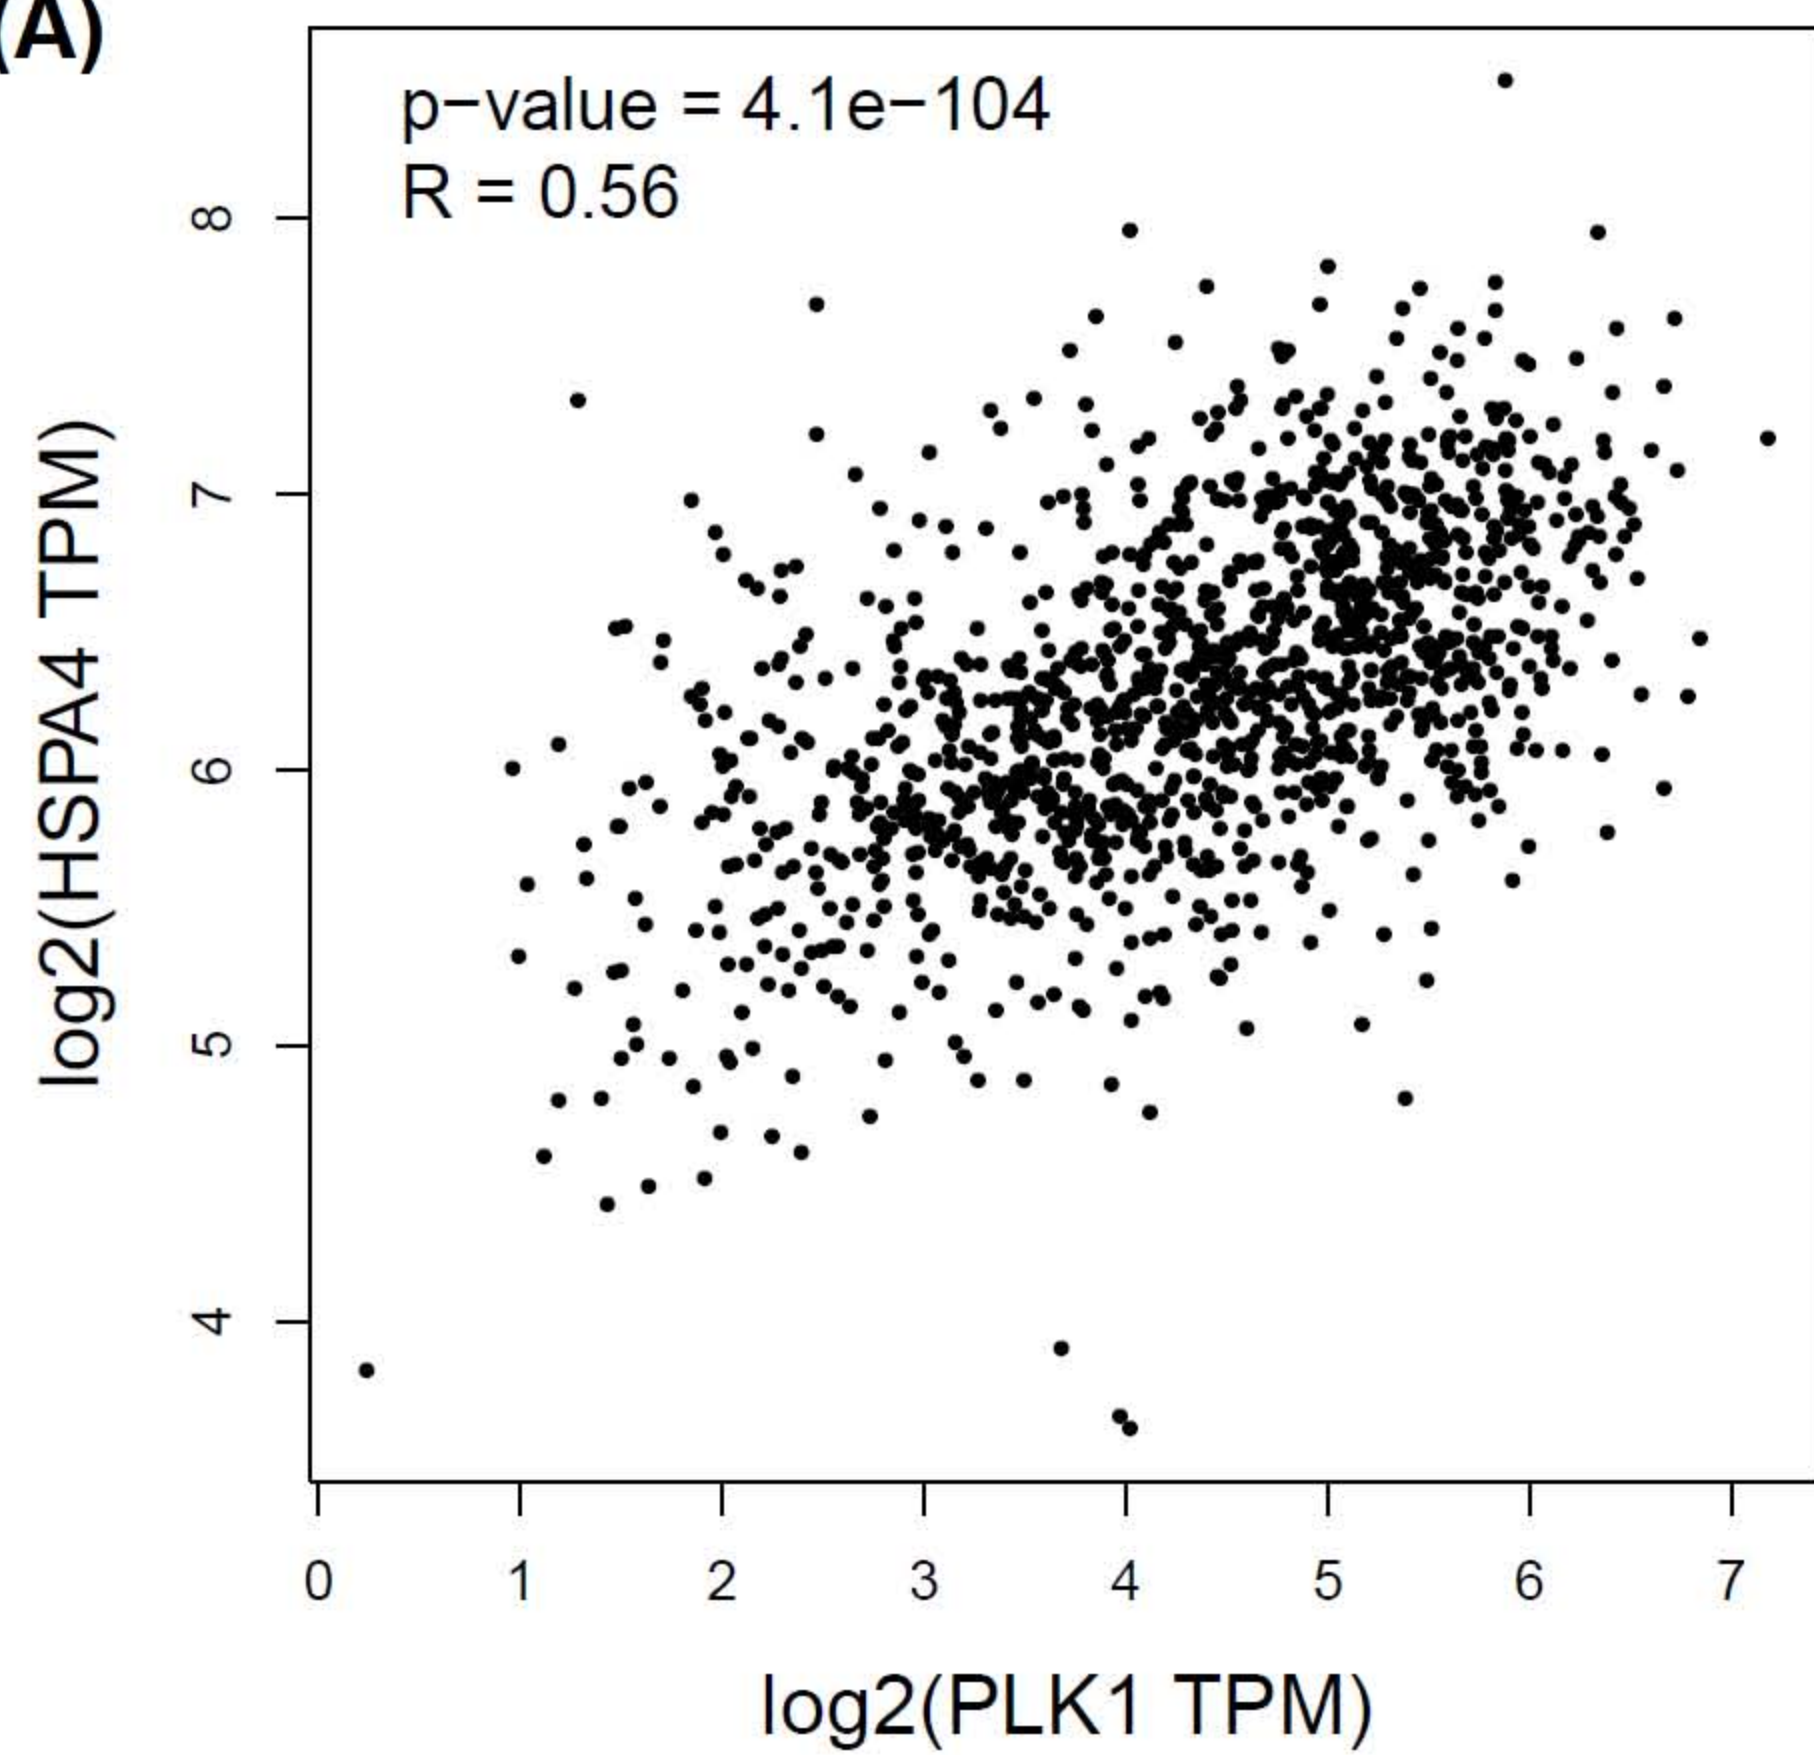**(B)**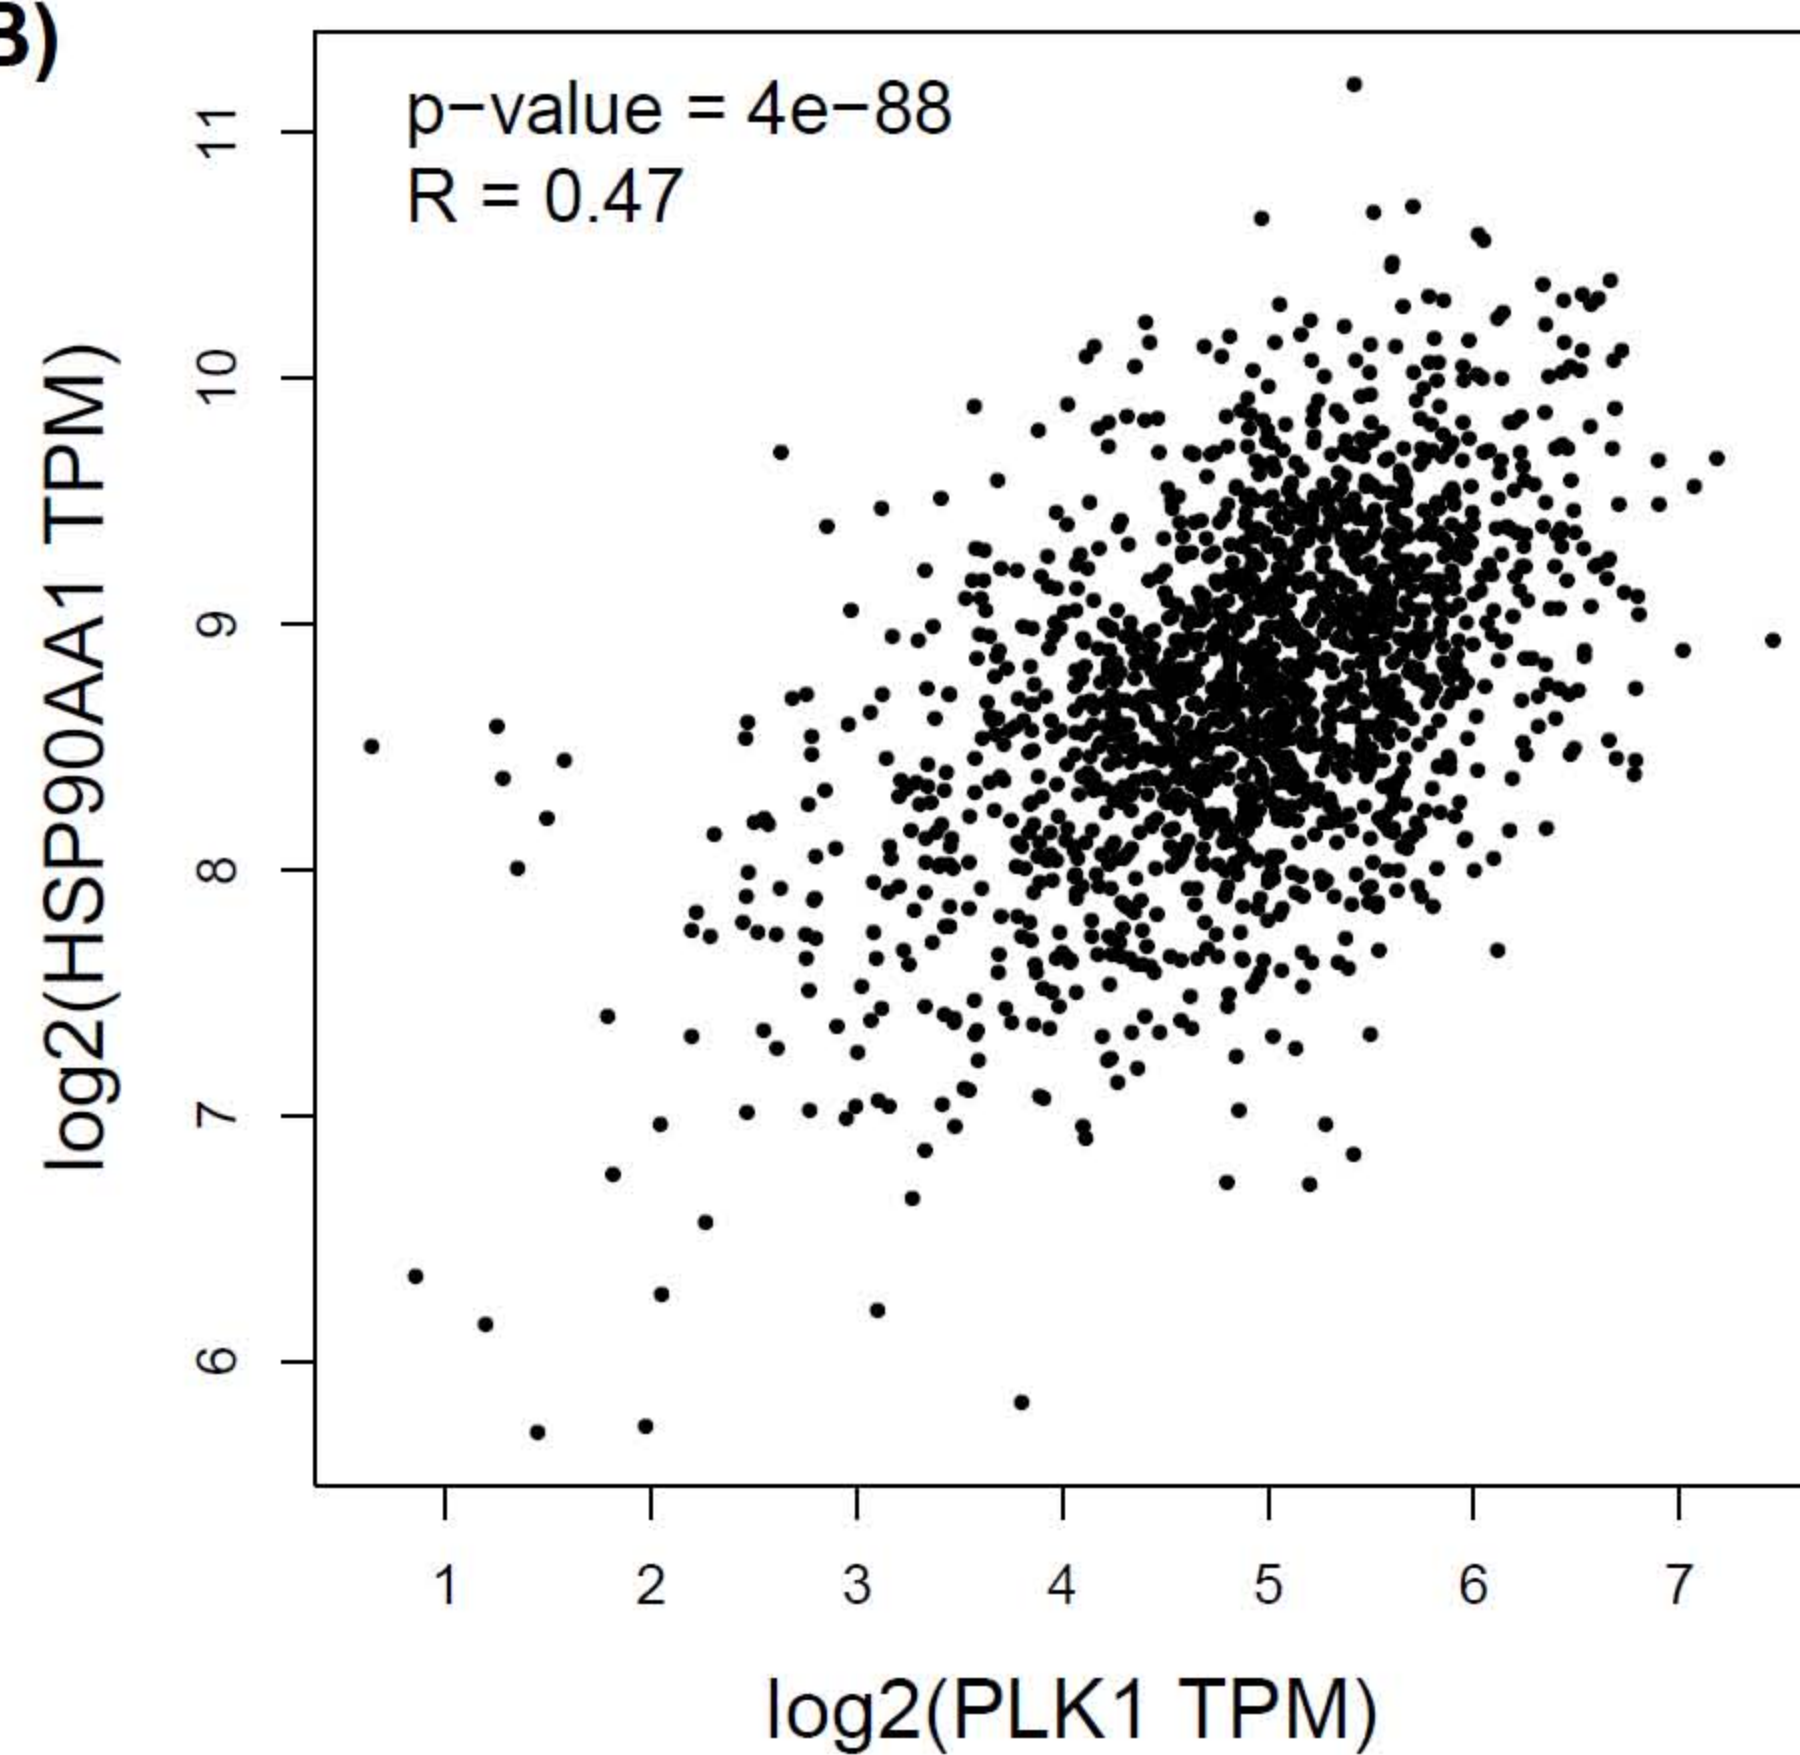**(C)**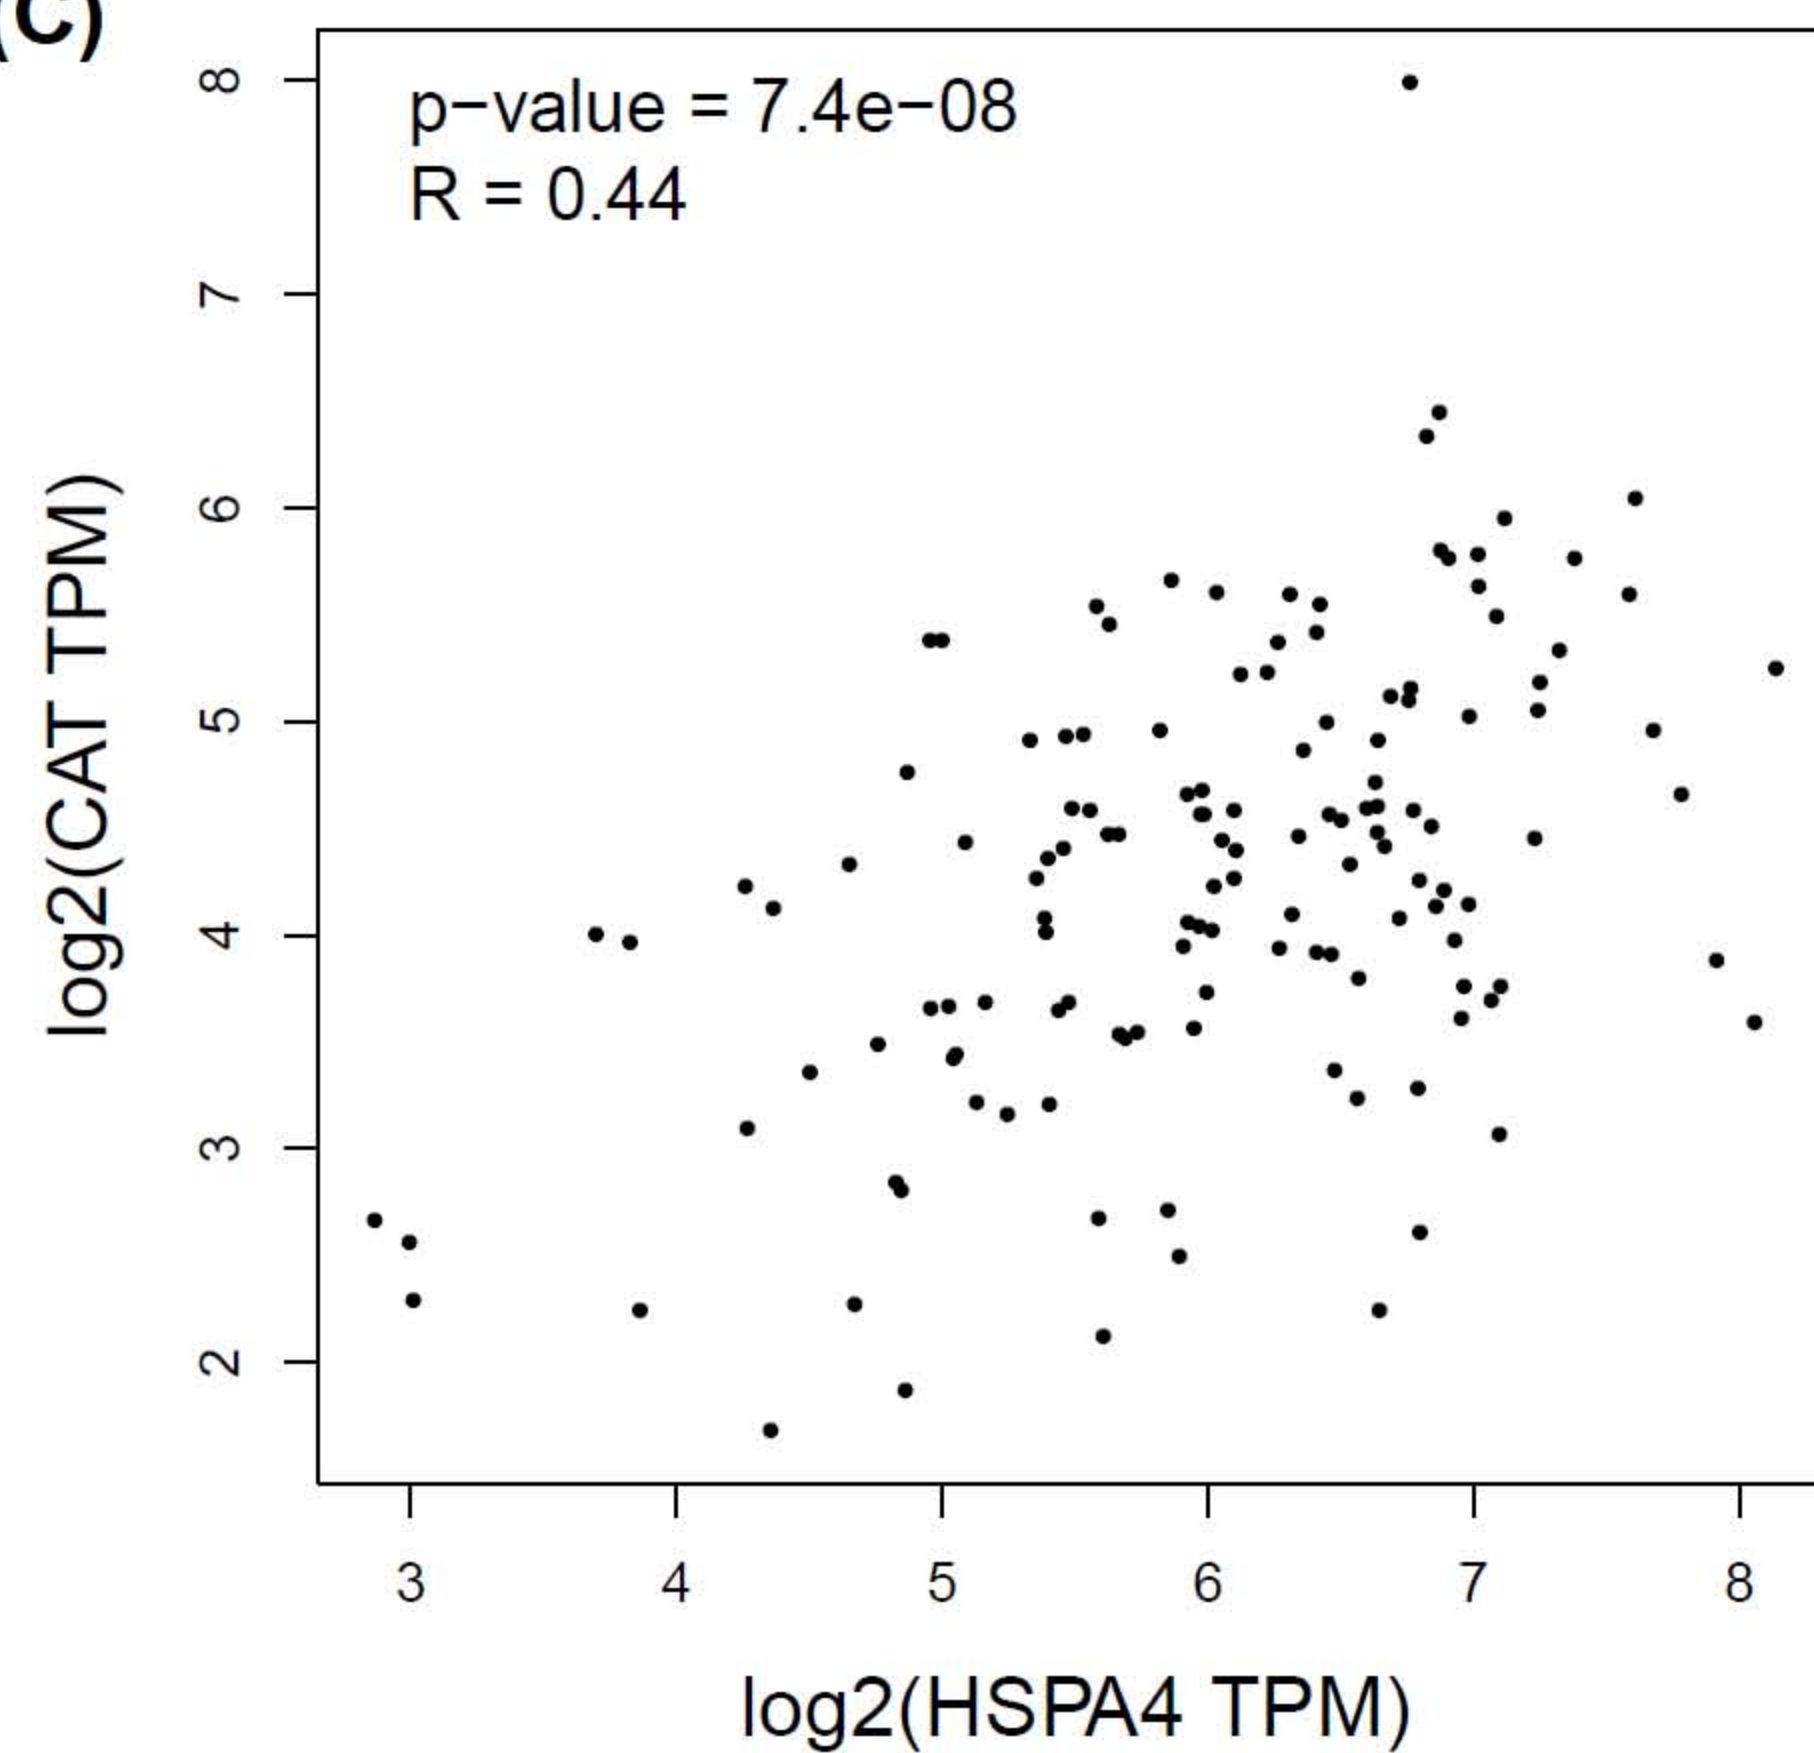**(D)**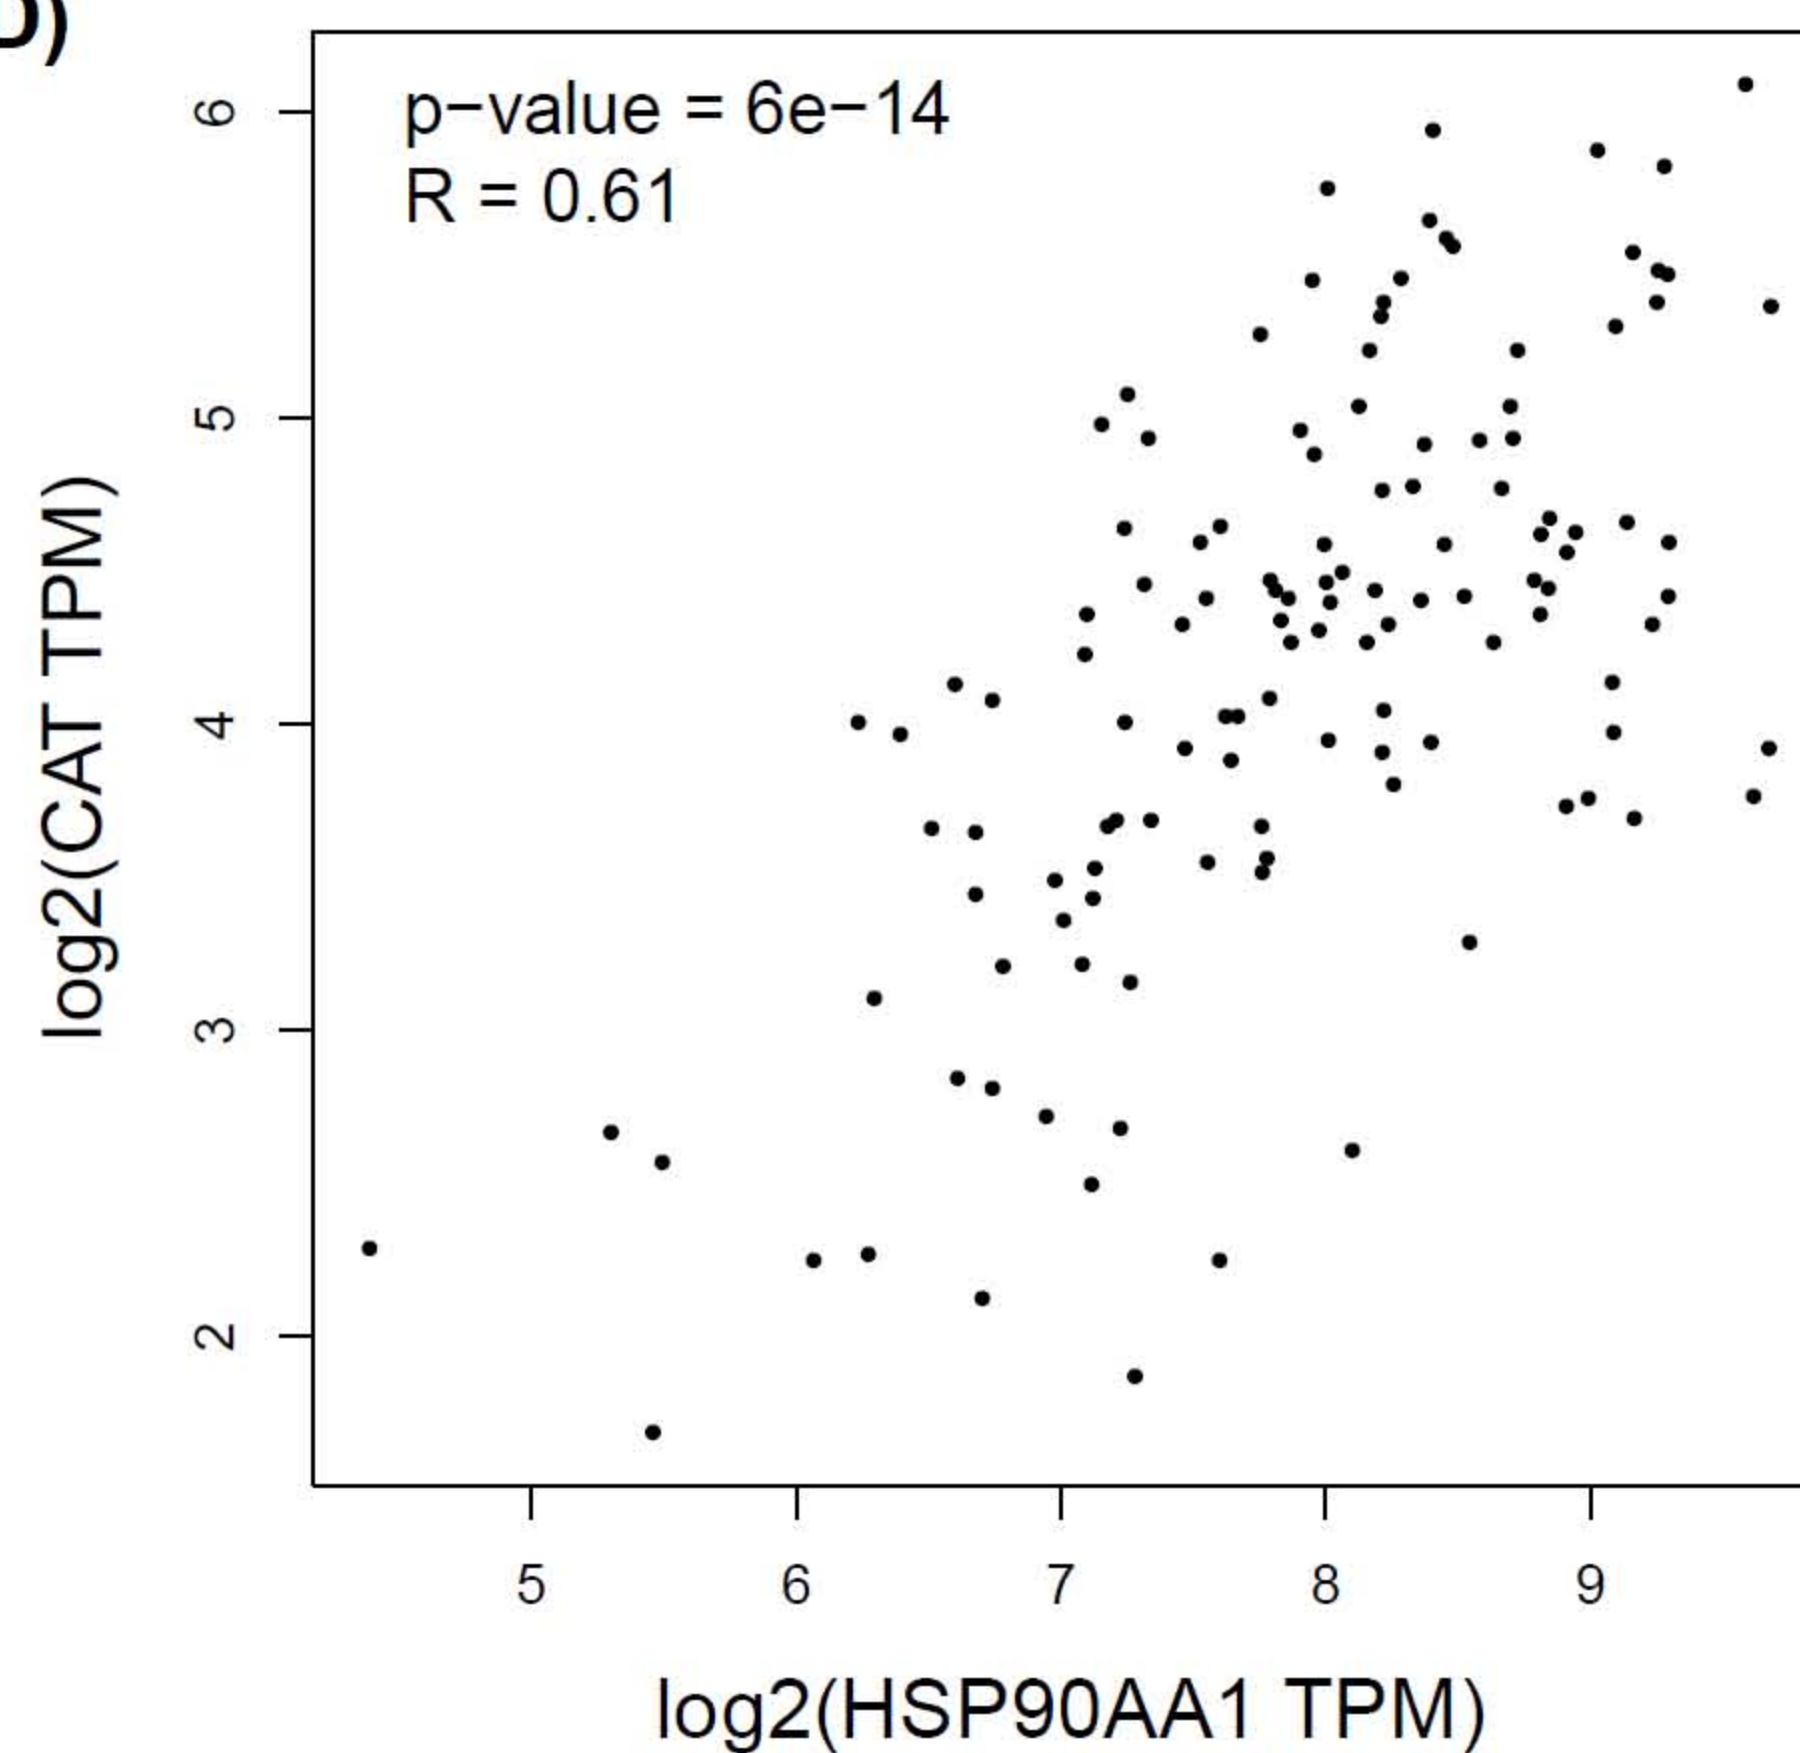

| Thermoresistance             |                                                                |             |
|------------------------------|----------------------------------------------------------------|-------------|
| ABCA1                        | ATP binding cassette subfamily A member 1                      | [1]         |
| ABCB1                        | ATP binding cassette subfamily B member 1                      | [2]         |
| ABCB8                        | ATP binding cassette subfamily B member 8                      | [1]         |
| ABCC4                        | ATP binding cassette subfamily C member 4                      | [1]         |
| ABCF2                        | ATP binding cassette subfamily F member 2                      | [1]         |
| ABCG2                        | ATP binding cassette subfamily G member 2 (Junior blood group) | [2]         |
| BAG1                         | BCL2 associated athanogene 1                                   | [1]         |
| BAG3                         | BCL2 associated athanogene 3                                   | [3]         |
| CCNA1                        | cyclin A1                                                      | [1]         |
| CDK8                         | cyclin dependent kinase 8                                      | [1]         |
| CRYAA                        | crystallin alpha A                                             | [1, 4]      |
| CRYGN                        | crystallin gamma N                                             | [1]         |
| CRYL1                        | crystallin lambda 1                                            | [1]         |
| CRYZL1                       | crystallin zeta like 1                                         | [1]         |
| CYP51A1P2                    | cytochrome P450 family 51 subfamily A member 1 pseudogene 2    | [1]         |
| DNAJA1                       | DnaJ heat shock protein family (Hsp40) member A1               | [1]         |
| DNAJB1                       | DnaJ heat shock protein family (Hsp40) member B1               | [3]         |
| DNAJB5                       | DnaJ heat shock protein family (Hsp40) member B5               | [1]         |
| DNAJB6                       | DnaJ heat shock protein family (Hsp40) member B6               | [1]         |
| DNAJC15                      | DnaJ heat shock protein family (Hsp40) member C15              | [1]         |
| DNAJC3                       | DnaJ heat shock protein family (Hsp40) member C3               | [1]         |
| HSF1                         | heat shock transcription factor 1                              | [3]         |
| HSP90AA1                     | heat shock protein 90 alpha family class A member 1            | [5]         |
| HSP90AB1                     | heat shock protein 90 alpha family class B member 1            | [6]         |
| HSPA12B                      | heat shock protein family A (Hsp70) member 12B                 | [1]         |
| HSPA1A                       | heat shock protein family A (Hsp70) member 1A                  | [7]         |
| HSPA4                        | heat shock protein family A (Hsp70) member 4                   | [3, 8]      |
| HSPA6                        | heat shock protein family A (Hsp70) member 6                   | [9]         |
| HSPB1                        | heat shock protein family B (small) member 1                   | [10]        |
| HSPD1                        | heat shock protein family D (Hsp60) member 1                   | [6]         |
| HSPH1                        | heat shock protein family H (Hsp110) member 1                  | [11]        |
| ILK                          | integrin linked kinase                                         | [12]        |
| PLK1                         | polo like kinase 1                                             | [3]         |
| RB1                          | RB transcriptional corepressor 1                               | [1]         |
| DAMPs/Immunogenic cell death |                                                                |             |
| B3GAT1                       | beta-1,3-glucuronyltransferase 1                               | [13]        |
| CALR                         | calreticulin                                                   | [14]        |
| CD4                          | CD4 molecule                                                   | [13, 15-18] |
| CD68                         | CD68 molecule                                                  | [19]        |
| CD80                         | CD80 molecule                                                  | [20]        |
| CD86                         | CD86 molecule                                                  | [20]        |
| CD8A                         | CD8a molecule                                                  | [13, 15-17] |
| HMGB1                        | high mobility group box 1                                      | [14]        |
| HSP90AA1                     | heat shock protein 90 alpha family class A member 1            | [21, 22]    |
| HSPA4                        | heat shock protein family A (Hsp70) member 4                   | [21, 22]    |

|          |                                      |          |
|----------|--------------------------------------|----------|
| ICAM1    | intercellular adhesion molecule 1    | [23]     |
| IFNG     | interferon gamma                     | [24]     |
| IL1B     | interleukin 1 beta                   | [25]     |
| IL10     | interleukin 10                       | [26]     |
| IL12B    | interleukin 12B                      | [20]     |
| IL2RA    | interleukin 2 receptor subunit alpha | [17]     |
| IL6      | interleukin 6                        | [26-28]  |
| ITGAX    | integrin subunit alpha X             | [29]     |
| MS4A1    | membrane spanning 4-domains A1       | [13]     |
| MUC1     | mucin 1, cell surface associated     | [24]     |
| NCAM1    | neural cell adhesion molecule 1      | [15, 19] |
| SELL     | selectin L                           | [24]     |
| TNF      | tumor necrosis factor                | [20, 25] |
| TNFRSF1A | TNF receptor superfamily member 1A   | [28]     |

## References

- [1] H. Tonnies, H. Lage, Chromosomal imbalances associated with drug resistance and thermoresistance in human pancreatic carcinoma cells, *European journal of cell biology*, 83 (2004) 591-601.
- [2] U. Stein, H. Lage, A. Jordan, W. Walther, S.E. Bates, T. Litman, P. Hohenberger, M. Dietel, Impact of BCRP/MXR, MRP1 and MDR1/P-Glycoprotein on thermoresistant variants of atypical and classical multidrug resistant cancer cells, *International journal of cancer*, 97 (2002) 751-760.
- [3] T. Yunoki, Y. Tabuchi, A. Hayashi, T. Kondo, Inhibition of polo-like kinase 1 promotes hyperthermia sensitivity via inactivation of heat shock transcription factor 1 in human retinoblastoma cells, *Investigative ophthalmology & visual science*, 54 (2013) 8353-8363.
- [4] I.P.R. van den, P. Overkamp, U. Knauf, M. Gaestel, W.W. de Jong, Alpha A-crystallin confers cellular thermoresistance, *FEBS letters*, 355 (1994) 54-56.
- [5] R. Yang, Q. Tang, F. Miao, Y. An, M. Li, Y. Han, X. Wang, J. Wang, P. Liu, R. Chen, Inhibition of heat-shock protein 90 sensitizes liver cancer stem-like cells to magnetic hyperthermia and enhances anti-tumor effect on hepatocellular carcinoma-burdened nude mice, *International journal of nanomedicine*, 10 (2015) 7345-7358.
- [6] G. van Dongen, W.L. Geilenkirchen, J. van Rijn, R. van Wijk, Increase of thermoresistance after growth stimulation of resting Reuber H35 hepatoma cells. Alteration of nuclear characteristics, non-histone chromosomal protein phosphorylation and basal heat shock protein synthesis, *Experimental cell research*, 166 (1986) 427-441.
- [7] C. Botzler, R. Issels, G. Multhoff, Heat-shock protein 72 cell-surface expression on human lung carcinoma cells is associated with an increased sensitivity to lysis mediated by adherent natural killer cells, *Cancer immunology, immunotherapy : CII*, 43 (1996) 226-230.
- [8] Z. Wang, S. Li, M. Zhang, Y. Ma, Y. Liu, W. Gao, J. Zhang, Y. Gu, Laser-Triggered Small Interfering RNA Releasing Gold Nanoshells against Heat Shock Protein for Sensitized Photothermal Therapy, *Advanced science*, 4 (2017) 1600327.
- [9] K.A. Court, H. Hatakeyama, S.Y. Wu, M.S. Lingegowda, C. Rodriguez-Aguayo, G. Lopez-Berestein, L. Ju-Seog, C. Rinaldi, E.J. Juan, A.K. Sood, M. Torres-Lugo, HSP70 inhibition synergistically enhances the effects of magnetic fluid hyperthermia in ovarian cancer, *Molecular cancer therapeutics*, (2017).
- [10] A. Fortin, H. Raybaud-Diogene, B. Tetu, R. Deschenes, J. Huot, J. Landry, Overexpression of the 27 KDa heat shock protein is associated with thermoresistance and chemoresistance but not with radioresistance, *International journal of radiation oncology, biology, physics*, 46 (2000) 1259-1266.
- [11] H.J. Oh, X. Chen, J.R. Subjeck, Hsp110 protects heat-denatured proteins and confers cellular thermoresistance, *The Journal of biological chemistry*, 272 (1997) 31636-31640.

- [12] X. Zhang, Y. Li, Q. Huang, H. Wang, B. Yan, M.W. Dewhirst, C.Y. Li, Increased resistance of tumor cells to hyperthermia mediated by integrin-linked kinase, *Clinical cancer research : an official journal of the American Association for Cancer Research*, 9 (2003) 1155-1160.
- [13] P. Lu, X.Q. Zhu, Z.L. Xu, Q. Zhou, J. Zhang, F. Wu, Increased infiltration of activated tumor-infiltrating lymphocytes after high intensity focused ultrasound ablation of human breast cancer, *Surgery*, 145 (2009) 286-293.
- [14] Z. Yu, J. Geng, M. Zhang, Y. Zhou, Q. Fan, J. Chen, Treatment of osteosarcoma with microwave thermal ablation to induce immunogenic cell death, *Oncotarget*, 5 (2014) 6526-6539.
- [15] A. Zerbini, M. Pilli, A. Penna, G. Pelosi, C. Schianchi, A. Molinari, S. Schivazappa, C. Zibera, F.F. Fagnoni, C. Ferrari, G. Missale, Radiofrequency thermal ablation of hepatocellular carcinoma liver nodules can activate and enhance tumor-specific T-cell responses, *Cancer research*, 66 (2006) 1139-1146.
- [16] S.A. Dromi, M.P. Walsh, S. Herby, B. Traugher, J. Xie, K.V. Sharma, K.P. Sekhar, A. Luk, D.J. Liewehr, M.R. Dreher, T.J. Fry, B.J. Wood, Radiofrequency ablation induces antigen-presenting cell infiltration and amplification of weak tumor-induced immunity, *Radiology*, 251 (2009) 58-66.
- [17] P. Zhou, P. Liang, B. Dong, X. Yu, Z. Han, Y. Xu, Phase clinical study of combination therapy with microwave ablation and cellular immunotherapy in hepatocellular carcinoma, *Cancer biology & therapy*, 11 (2011) 450-456.
- [18] F. Wu, Z.B. Wang, P. Lu, Z.L. Xu, W.Z. Chen, H. Zhu, C.B. Jin, Activated anti-tumor immunity in cancer patients after high intensity focused ultrasound ablation, *Ultrasound in medicine & biology*, 30 (2004) 1217-1222.
- [19] B.W. Dong, J. Zhang, P. Liang, X.L. Yu, L. Su, D.J. Yu, X.L. Ji, G. Yu, Sequential pathological and immunologic analysis of percutaneous microwave coagulation therapy of hepatocellular carcinoma, *International journal of hyperthermia : the official journal of European Society for Hyperthermic Oncology, North American Hyperthermia Group*, 19 (2003) 119-133.
- [20] Z. Hu, X.Y. Yang, Y. Liu, M.A. Morse, H.K. Lyerly, T.M. Clay, P. Zhong, Release of endogenous danger signals from HIFU-treated tumor cells and their stimulatory effects on APCs, *Biochemical and biophysical research communications*, 335 (2005) 124-131.
- [21] G. Schueller, P. Paolini, J. Friedl, A. Stift, P. Dubsy, T. Bachleitner-Hofmann, R. Jakesz, M. Gnant, Heat treatment of hepatocellular carcinoma cells: increased levels of heat shock proteins 70 and 90 correlate with cellular necrosis, *Anticancer research*, 21 (2001) 295-300.
- [22] G. Schueller, J. Kettenbach, R. Sedivy, A. Stift, J. Friedl, M. Gnant, J. Lammer, Heat shock protein expression induced by percutaneous radiofrequency ablation of hepatocellular carcinoma in vivo, *International journal of oncology*, 24 (2004) 609-613.
- [23] J. Nakayama, A. Urabe, H. Terao, S. Taniguchi, Y. Hori, In situ detection of immunocompetent cells in murine B16 melanoma locally treated with interleukin-2 or microwaval hyperthermia, *Pigment cell research*, 6 (1993) 111-116.
- [24] C. Napoletano, F. Taurino, M. Biffoni, A. De Majo, G. Coscarella, F. Bellati, H. Rahimi, S. Pauselli, I. Pellicciotta, J.M. Burchell, L.A. Gaspari, L. Ercoli, P. Rossi, A. Ruggetti, RFA strongly modulates the immune system and anti-tumor immune responses in metastatic liver patients, *International journal of oncology*, 32 (2008) 481-490.
- [25] M.Y. Ali, C.F. Grimm, M. Ritter, L. Mohr, H.P. Allgaier, R. Weth, W.O. Bocher, K. Endrulat, H.E. Blum, M. Geissler, Activation of dendritic cells by local ablation of hepatocellular carcinoma, *Journal of hepatology*, 43 (2005) 817-822.
- [26] J.P. Erinjeri, C.T. Thomas, A. Samoilia, M. Fleisher, M. Gonen, C.T. Sofocleous, R.H. Thornton, R.H. Siegelbaum, A.M. Covey, L.A. Brody, W. Alago, Jr., M. Maybody, K.T. Brown, G.I. Getrajdman, S.B. Solomon, Image-guided thermal ablation of tumors increases the plasma level of interleukin-6 and interleukin-10, *Journal of vascular and interventional radiology : JVIR*, 24 (2013) 1105-1112.
- [27] M.C. Jansen, S. van Wanrooy, R. van Hillegersberg, A.M. Rijken, F. van Coevorden, W. Prevoo, T.M. van Gulik, Assessment of systemic inflammatory response (SIR) in patients undergoing radiofrequency ablation or partial liver resection for liver tumors, *European journal of surgical oncology : the journal of the European Society of Surgical Oncology and the British Association of Surgical Oncology*, 34 (2008) 662-667.
- [28] R. Kallio, R. Sequeiros, H.M. Surcel, P. Ohtonen, H. Kiviniemi, H. Syrjala, Early cytokine responses after percutaneous magnetic resonance imaging guided laser thermoablation of malignant liver tumors, *Cytokine*, 34 (2006) 278-283.

[29] Z. Hu, X.Y. Yang, Y. Liu, G.N. Sankin, E.C. Pua, M.A. Morse, H.K. Lysterly, T.M. Clay, P. Zhong, Investigation of HIFU-induced anti-tumor immunity in a murine tumor model, *Journal of translational medicine*, 5 (2007) 34.

| Thermoresistance |             |                     |                                    |
|------------------|-------------|---------------------|------------------------------------|
| Protein symbol   | TM Index    | 100% accuracy range | Estimated Melting Temperature (°C) |
| ABCA1            | 0,790761219 | 55°C~65             | 63                                 |
| ABCB1            | 0,8397      | 55-65               | 64                                 |
| ABCB8            | 0,59        | 55-65               | 60                                 |
| ABCC4            | 0,8801      | 55-65               | 64                                 |
| ABCF2            | 0,8198      | 55-65               | 64                                 |
| ABCG2            | 0,6886      | 55-65               | 62                                 |
| BAG1             | 0,7904      | 55-65               | 63                                 |
| BAG3             | 1,3227      | >65                 | 68                                 |
| CCNA1            | 1,7758      | >65                 | 72                                 |
| CDK8             | 1,4254      | >65                 | 69                                 |
| CRYAA            | 2,0951      | >65                 | 75                                 |
| CRYGN            | 1,4721      | >65                 | 69                                 |
| CRYL1            | 1,5067      | >65                 | 70                                 |
| CRYZL1           | 1,6749      | >65                 | 67                                 |
| DNAJA1           | 2,2314      | >65                 | 77                                 |
| DNAJB1           | 0,0561      | 55-65               | 55                                 |
| DNAJB5           | 2,9076      | >65                 | 84                                 |
| DNAJB6           | 1,4748      | >65                 | 69                                 |
| DNAJC15          | 1,042       | >65                 | 65                                 |
| DNAJC3           | 1,2607      | >65                 | 67                                 |
| HSF1             | 1,9936      | >65                 | 74                                 |
| HSP90AA1         | 0,6188      | 55-65               | 61                                 |
| HSP90AB1         | 1,1635      | >65                 | 66                                 |
| HSPA12B          | 0,9433      | 55-65               | 65                                 |
| HSPA1A           | 1,2719      | >65                 | 67                                 |
| HSPA4            | 1,7797      | >65                 | 72                                 |
| HSPA6            | 1,024       | >65                 | 65                                 |
| HSPB1            | 0,6616      | 55-65               | 61                                 |
| HSPD1            | 1,791988034 | >65                 | 72                                 |
| HSPH1            | 1,1335      | >65                 | 66                                 |
| ILK              | 1,5915      | >65                 | 70                                 |
| PLK1             | 0,6488      | 55-65               | 61                                 |
| RB1              | 0,9353      | 55-65               | 64                                 |

| DAMPs/Immunogenic cell death |             |                     |                                    |
|------------------------------|-------------|---------------------|------------------------------------|
| Protein symbol               | TM Index    | 100% accuracy range | Estimated Melting Temperature (°C) |
| B3GAT1                       | -0,1747     | <55                 | 53                                 |
| CALR                         | -0,8216     | <55                 | 47                                 |
| CD4                          | 1,30091     | >65                 | 68                                 |
| CD68                         | 0,846       | 55-65               | 63                                 |
| CD80                         | 0,828       | 55-65               | 63                                 |
| CD86                         | 1,6222      | >65                 | 71                                 |
| CD8A                         | 1,2732      | >65                 | 67                                 |
| HMGB1                        | 1,5873      | >65                 | 70                                 |
| HSP90AA1                     | 0,6188      | 55-65               | 61                                 |
| HSPA4                        | 1,7797      | >65                 | 72                                 |
| ICAM1                        | 1,3884      | >65                 | 68                                 |
| IFNG                         | 2,2082      | >65                 | 77                                 |
| IL1B                         | -0,5442     | <55                 | 50                                 |
| IL10                         | 1,3101      | >65                 | 68                                 |
| IL12B                        | 0,2283      | 55-65               | 57                                 |
| IL2RA                        | 0,2359      | 55-65               | 57                                 |
| IL6                          | 0,693566365 | 55-65               | 61                                 |
| ITGAX                        | 1,5517      | >65                 | 70                                 |
| MS4A1                        | 1,3128      | >65                 | 68                                 |
| MUC1                         | 1,5306      | >65                 | 70                                 |
| NCAM1                        | 0,3275      | 55-65               | 58                                 |
| SELL                         | -0,7243     | <55                 | 48                                 |
| TNF                          | 2,3462      | >65                 | 78                                 |
| TNFRSF1A                     | 0,26588     | 55-65               | 57                                 |
